# Supplementary material
Source: publisher figshare collection journal article supplement (https://asha.figshare.com/ndownloader/files/34470425)
Supplement: Supplementary file 1 [file 34470425]

**Supplemental Material S1.** Letter–sound correspondence lesson coding rubric.

| Instructional Step                  | Instructional Component                                                                                                                                                                             | Implementation                                                                                                               |
|-------------------------------------|-----------------------------------------------------------------------------------------------------------------------------------------------------------------------------------------------------|------------------------------------------------------------------------------------------------------------------------------|
| <b>Step 1: Introduction to task</b> | <ul style="list-style-type: none"> <li>Introduces the task (e.g., Today we are going to learn about letters and their sounds)</li> </ul>                                                            | <input type="checkbox"/>                                                                                                     |
|                                     | <ul style="list-style-type: none"> <li>Uses picture card template to label each word and relates @ least 2 target words to learner</li> </ul>                                                       |                                                                                                                              |
|                                     | <ul style="list-style-type: none"> <li>Produces letter sound correctly (using sound NOT name) and points to letter on page a minimum of 2 times</li> </ul>                                          | <input type="checkbox"/>                                                                                                     |
|                                     |                                                                                                                                                                                                     | Score: <input type="text"/> / 8 (must get 4 to move on)                                                                      |
| <b>Step 2: Model</b>                | <ul style="list-style-type: none"> <li>Says, “I’ll show you” (or something similar to introduce the step)</li> </ul>                                                                                | <input type="checkbox"/>                                                                                                     |
|                                     | <ul style="list-style-type: none"> <li>Places two letter tiles in front of learner</li> </ul>                                                                                                       | <input type="checkbox"/> <input type="checkbox"/>                                                                            |
|                                     | <ul style="list-style-type: none"> <li>Produces the target sound correctly in each trial (e.g., mmm)</li> </ul>                                                                                     | <input type="checkbox"/> <input type="checkbox"/>                                                                            |
|                                     | <ul style="list-style-type: none"> <li>Points to or picks up the correct letter card</li> </ul>                                                                                                     | <input type="checkbox"/> <input type="checkbox"/>                                                                            |
|                                     | <ul style="list-style-type: none"> <li>Provides a total of 2 trials/models</li> </ul>                                                                                                               | <input type="checkbox"/>                                                                                                     |
|                                     |                                                                                                                                                                                                     | Score: <input type="text"/> / 8 (must get 4 to move on)                                                                      |
| <b>Step 3: Guided Practice</b>      | <ul style="list-style-type: none"> <li>Says, “Let’s do this together” (or something to similar indicate next step)</li> </ul>                                                                       | <input type="checkbox"/>                                                                                                     |
|                                     | <ul style="list-style-type: none"> <li>Increases the number of letter tiles – going from 2, to 3, to 4</li> </ul>                                                                                   | <input type="checkbox"/>                                                                                                     |
|                                     | <ul style="list-style-type: none"> <li>Provides a minimum of 5 trials within Step 3 for a single letter-sound</li> </ul>                                                                            | <input type="checkbox"/> <input type="checkbox"/> <input type="checkbox"/> <input type="checkbox"/> <input type="checkbox"/> |
|                                     | <ul style="list-style-type: none"> <li>Rearranges the order of letter cards after each trial offered</li> </ul>                                                                                     | <input type="checkbox"/> <input type="checkbox"/> <input type="checkbox"/> <input type="checkbox"/> <input type="checkbox"/> |
|                                     | <ul style="list-style-type: none"> <li>Says the target sound (e.g., “mmm”) correctly each trial</li> </ul>                                                                                          | <input type="checkbox"/> <input type="checkbox"/> <input type="checkbox"/> <input type="checkbox"/> <input type="checkbox"/> |
|                                     |                                                                                                                                                                                                     | Score: <input type="text"/> / 17 (must get 8 to move on)                                                                     |
| <b>Step 4: Independent Practice</b> | <ul style="list-style-type: none"> <li>States, “You try some” (or something to indicate next step)</li> </ul>                                                                                       | <input type="checkbox"/>                                                                                                     |
|                                     | <ul style="list-style-type: none"> <li>A minimum of three trials with four letter cards</li> </ul>                                                                                                  | <input type="checkbox"/> <input type="checkbox"/> <input type="checkbox"/> <input type="checkbox"/>                          |
|                                     | <ul style="list-style-type: none"> <li>Says the target sound correctly per trial (e.g., “mmm”)</li> </ul>                                                                                           | <input type="checkbox"/> <input type="checkbox"/> <input type="checkbox"/>                                                   |
|                                     | <ul style="list-style-type: none"> <li>Rearranges the order of letter cards after each trial offered</li> </ul>                                                                                     | <input type="checkbox"/> <input type="checkbox"/> <input type="checkbox"/>                                                   |
|                                     | <ul style="list-style-type: none"> <li>Provides corrective feedback if the learner does not point, or points to incorrect letter (e.g., “that letter says, ‘sss,’ this letter is ‘mmm’”)</li> </ul> | <input type="checkbox"/>                                                                                                     |
|                                     | <ul style="list-style-type: none"> <li></li> </ul>                                                                                                                                                  | Score: <input type="text"/> / 11 (must get 6 to move on)                                                                     |
| <b>Step 5: Extension</b>            | <ul style="list-style-type: none"> <li>Select an extension activity and try to provide 5 trials</li> </ul>                                                                                          | <input type="checkbox"/> <input type="checkbox"/>                                                                            |
|                                     |                                                                                                                                                                                                     | Score: <input type="text"/> / 2 (may not have time for 5 trials)                                                             |
|                                     |                                                                                                                                                                                                     | TOTAL: <input type="text"/> / 46                                                                                             |
